# Supplementary material for: Genome-wide SNP analysis explains coral diversity and recovery in the Ryukyu Archipelago
Source: PubMed Central journal article supplement (PMC4674749; doi:10.1038/srep18211), 2015-12-10
Supplement: srep18211-s1.pdf [file srep18211-s1.pdf]

# **Genome-wide SNP analysis explains coral diversity and recovery in the Ryukyu Archipelago**

**Chuya Shinzato<sup>1\*,#</sup>, Sutada Mungpakdee<sup>1\*</sup>, Nana Arakaki<sup>2</sup>, Noriyuki Satoh<sup>1</sup>**

<sup>1</sup>Marine Genomics Unit, Okinawa Institute of Science and Technology Graduate University, Onna, Okinawa 904-0495, Japan

<sup>2</sup>DNA Sequence Section, Okinawa Institute of Science and Technology Graduate University, Onna, Okinawa 904-0495, Japan

-----  
\*These authors contributed equally to this work.

#Corresponding author. Phone: +81-98-966-8653; Fax: +81-98-966-8653

E-mail: [c.shinzato@oist.jp](mailto:c.shinzato@oist.jp)  
-----

### Supplementary Figure Legends

Supplementary Fig. 1. Heterozygosity rate and missing rate for the 155 individuals. The heterozygosity rate cutoff of 0.12 and the missing genotype rate of 0.35 are shown with dashed lines. Colors represent sampling sites as follows; blue: Hedo, green: Oodo, red: Ikei, blueviolet: Uehara, dark olive green: Ishigaki island (Kabira, Oohama), magenta: Kerama, pink: Manza, brown: Ohdo, gray: Sesoko.

Supplementary Fig. 2. Linkage disequilibrium patterns of 11 sampling sites showing that there are no differences in decay patterns. The X axis shows pairwise distances of SNPs and the y axis shows average  $r^2$  in non-overlapping 100 bp bins.

Supplementary Fig. 3. An example of ancestry estimation using model-based clustering ADMIXTURE (K=4). Cluster names identified by PCA (Fig. 2a) are shown. Pie charts show average proportions of ancestral populations in each cluster.

Supplementary Fig. 4. Isolation-by-distance (IBD) estimated from pairwise  $F_{st} / (1-F_{st})$  values for combinations of 11 sampling sites, showing that the log of genetic distance is positively correlated with geographic distance.

Supplementary Fig. 5. Inferred tree of *A. digitifera* populations in the sRA without admixture events, showing that the tree topology is clearly related to island biogeography. (A) Maximum likelihood tree generated by *TreeMix*. (B) Pairwise residual fit generated by *TreeMix*. Residuals above zero represent populations that are more closely related to each other in the data than in the best-fit tree, and thus are candidates for admixture events. Colors are described in the palette on the right.

Supplementary Fig. 6. Increase in log-likelihood as a function of the number of migration events (0 to 15) in *TreeMix*, showing that a value of 13 migration events (used in Figure 3) is reasonable. Asterisks indicate the migrations that stepwise comparisons of log likelihood between migration events (13 and 14, and 14 and 15) became insignificant (likelihood-ratio test,  $p > 0.05$ ).

Supplementary Fig. 7. Heterozygosity rate at each sampling site, showing that the KIs, with high heterozygosity, constitute a sink population. The X-axis represents sampling sites and the Y-axis represents heterozygosity rate per individual. The median, the lower and upper quartiles, and outliers are shown. Colors are allocated to sub-populations identified in the PCA analysis (Okinawa: green, Kerama: pink, Yaeyama-North: blue and Yaeyama-South: purple). Tukey-Kramer test was performed for checking differences in heterozygosity rates among all site combinations. Asterisks show significant differences between sites (p-value below 0.01).

### **Supplementary Table legends**

Supplementary Table 1. Summary of the *Acropora digitifera* genome assembly version 1.1.

Supplementary Table 2. Mapping coverage for each individual.

Supplementary Table 3. Results of three-population test. Significant migration (Z score below -1.96,  $p < 0.05$ ) results are shown.

Supplementary Table 4. Migration weight and p-values inferred by *TreeMix* with 13 migration events allowed. Bootstrap support more than 50% (see Supplementary Table 5) are shown.

Supplementary Table 5. Bootstrap support percentages (100 replicates) for each migration edges (m= 3 to 14).

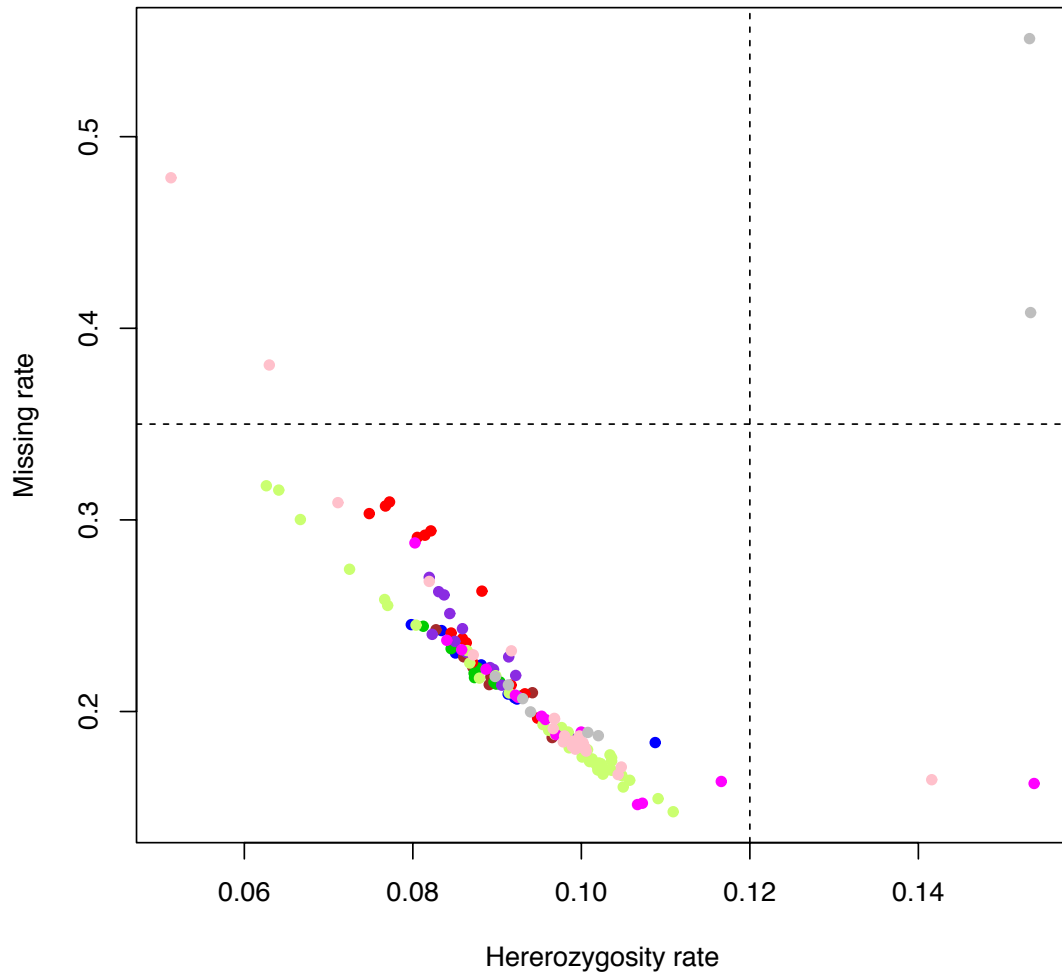

**Supplementary Fig. 1**

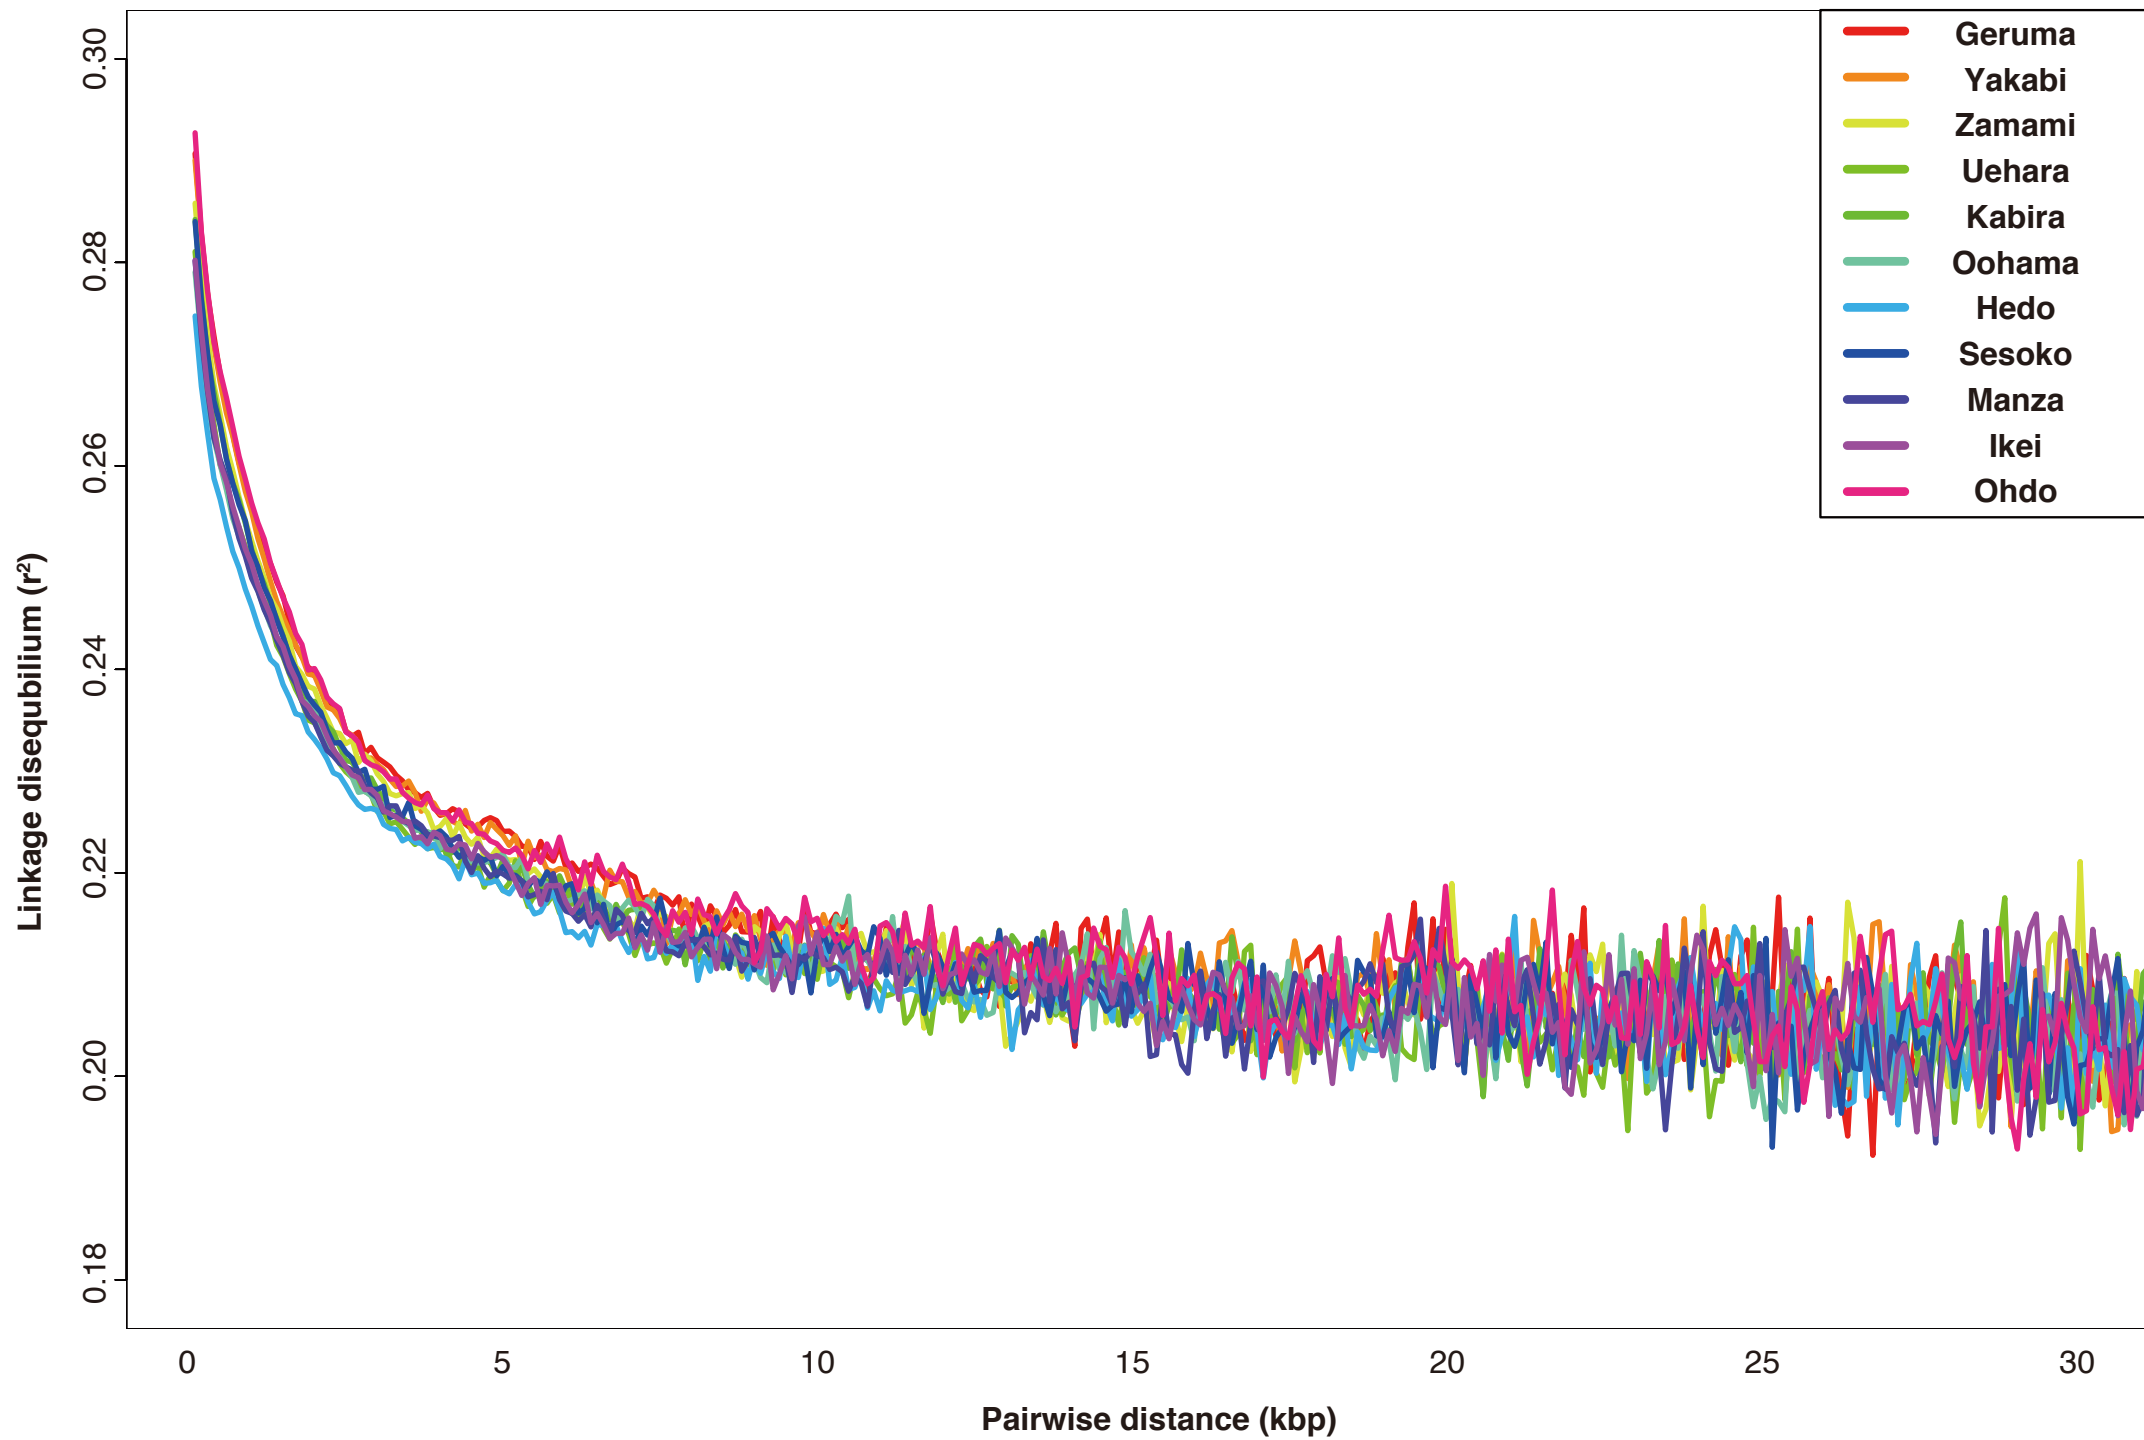

**Supplementary Fig. 2**

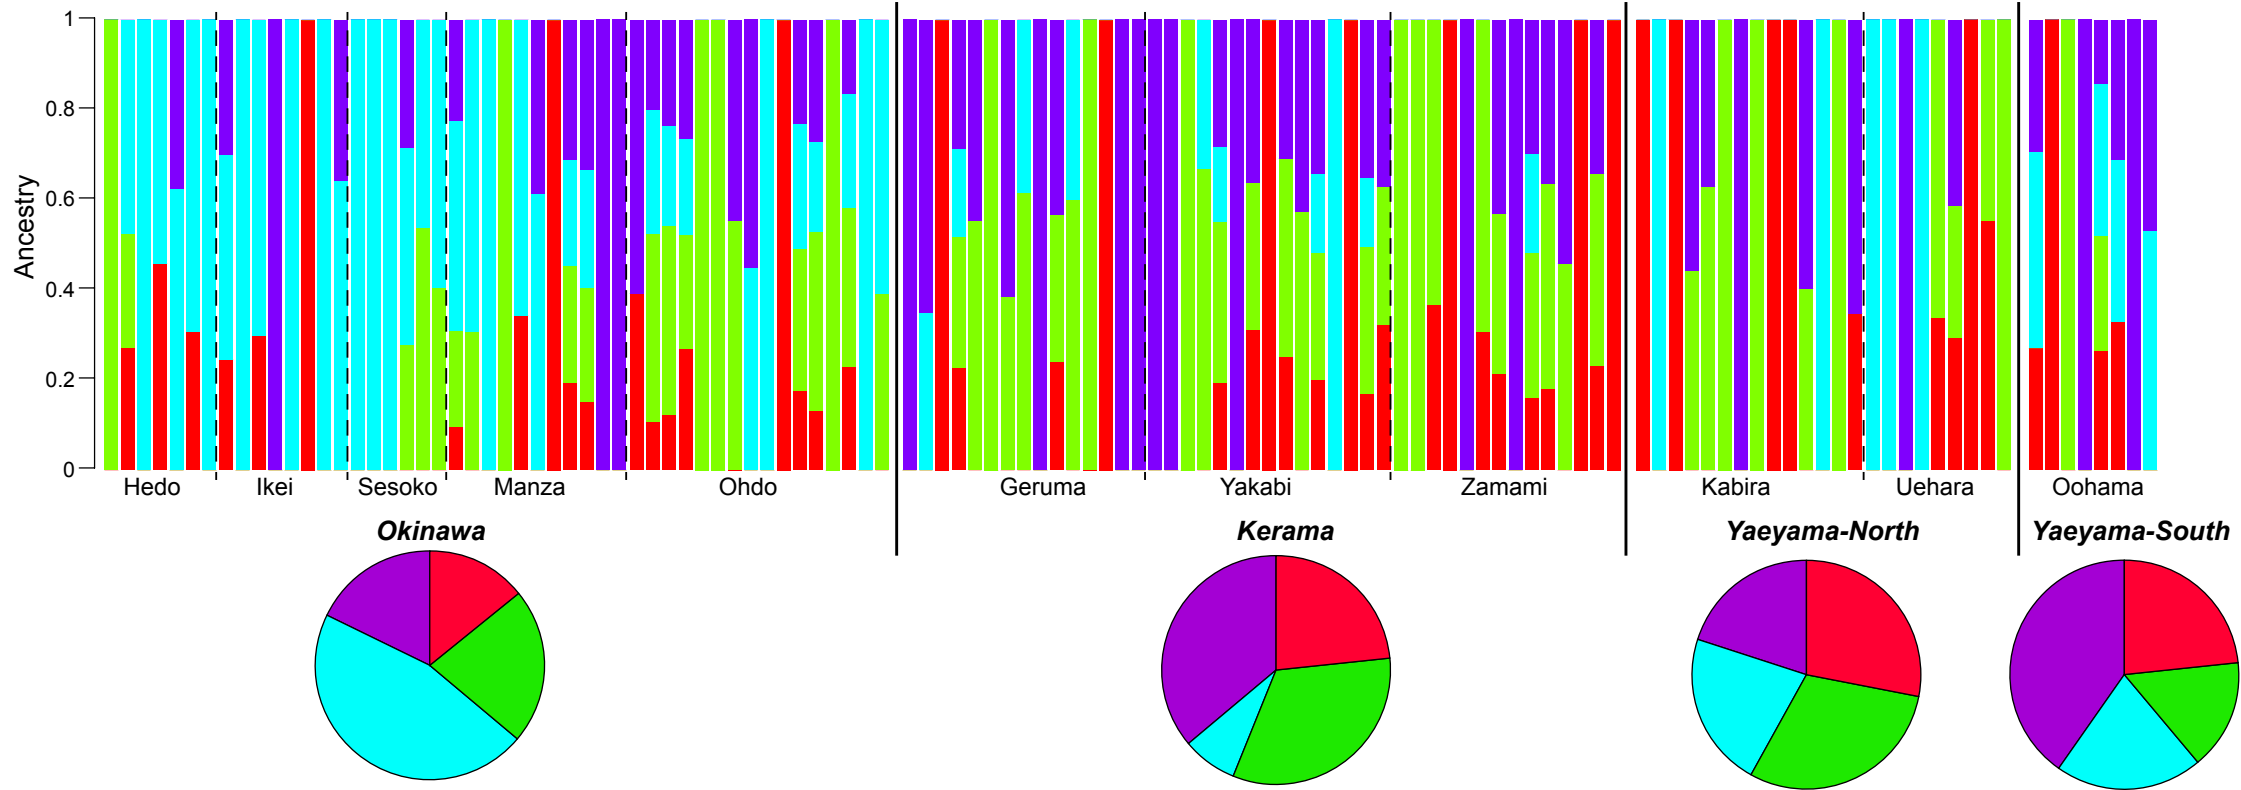

**Supplementary Fig. 3**

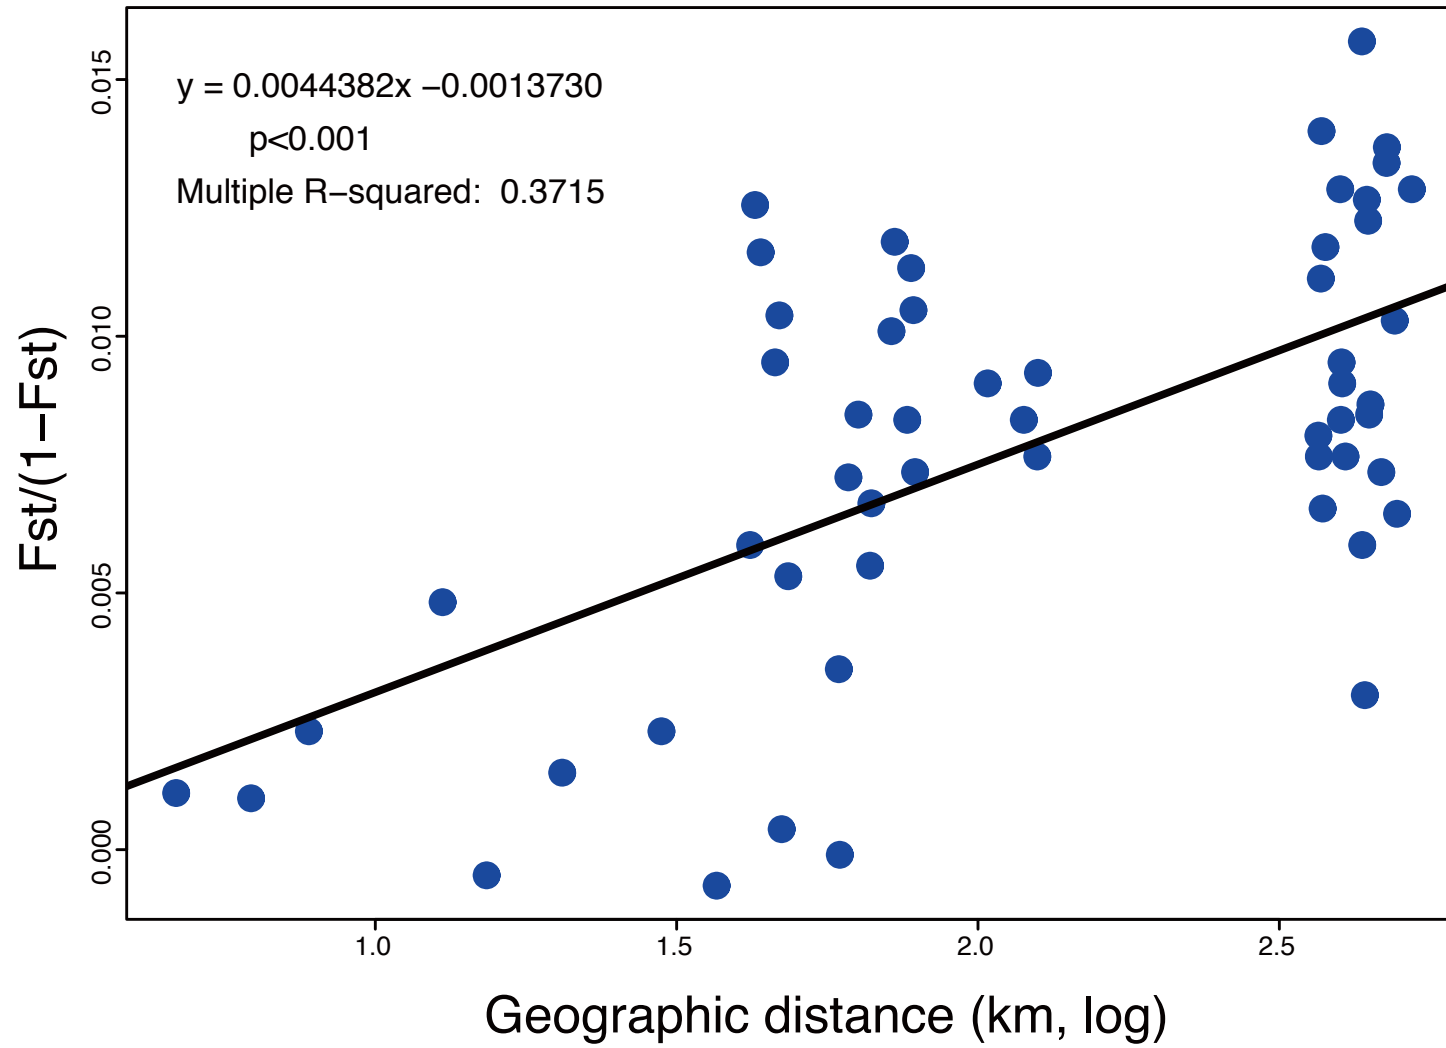

**Supplementary Fig. 4**

**(a)**

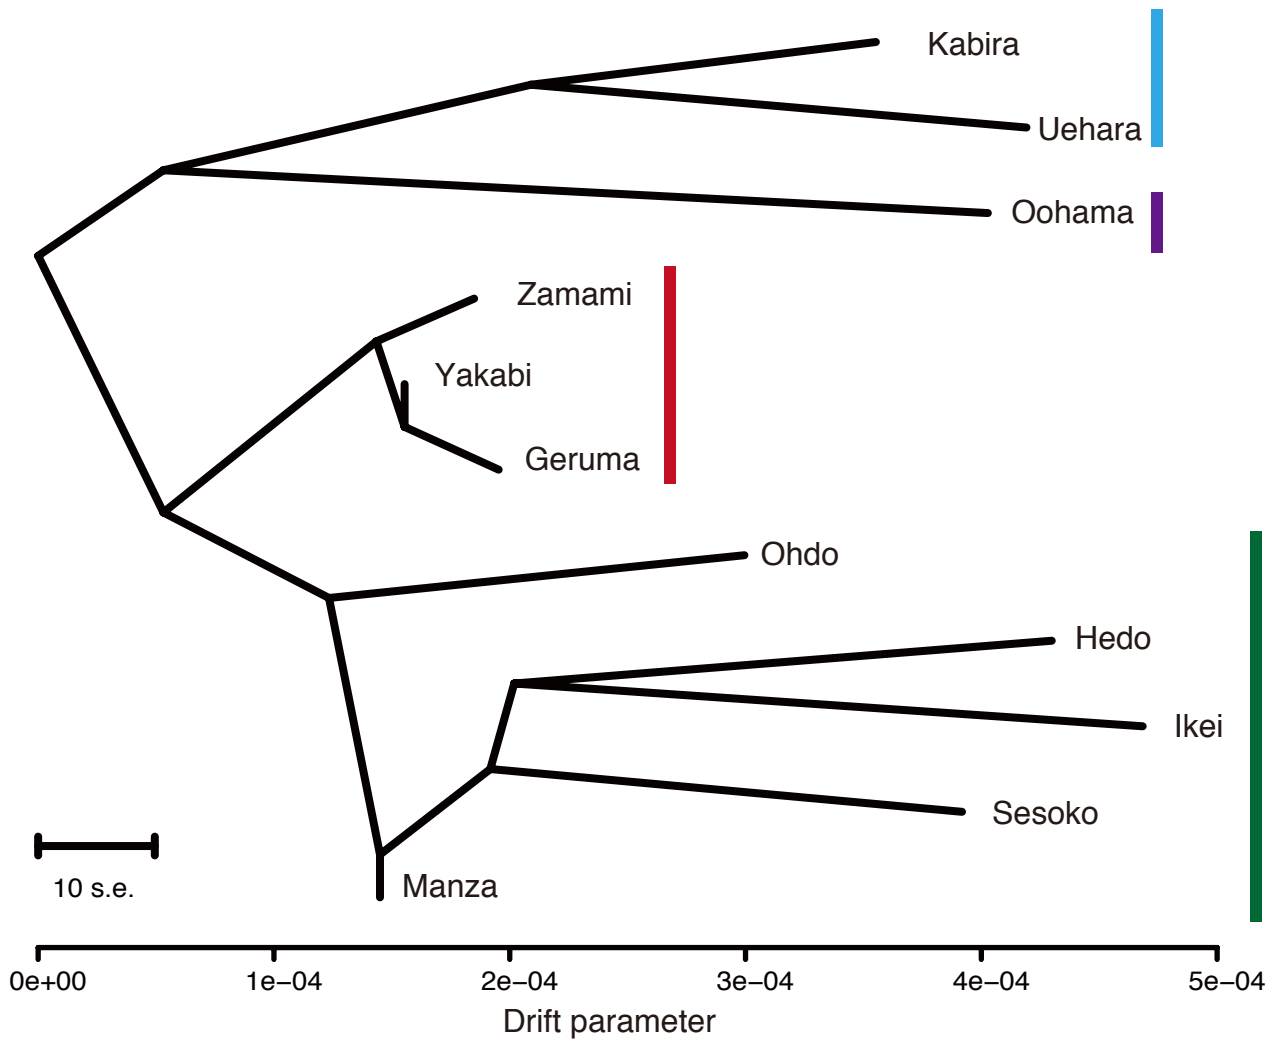

**(b)**

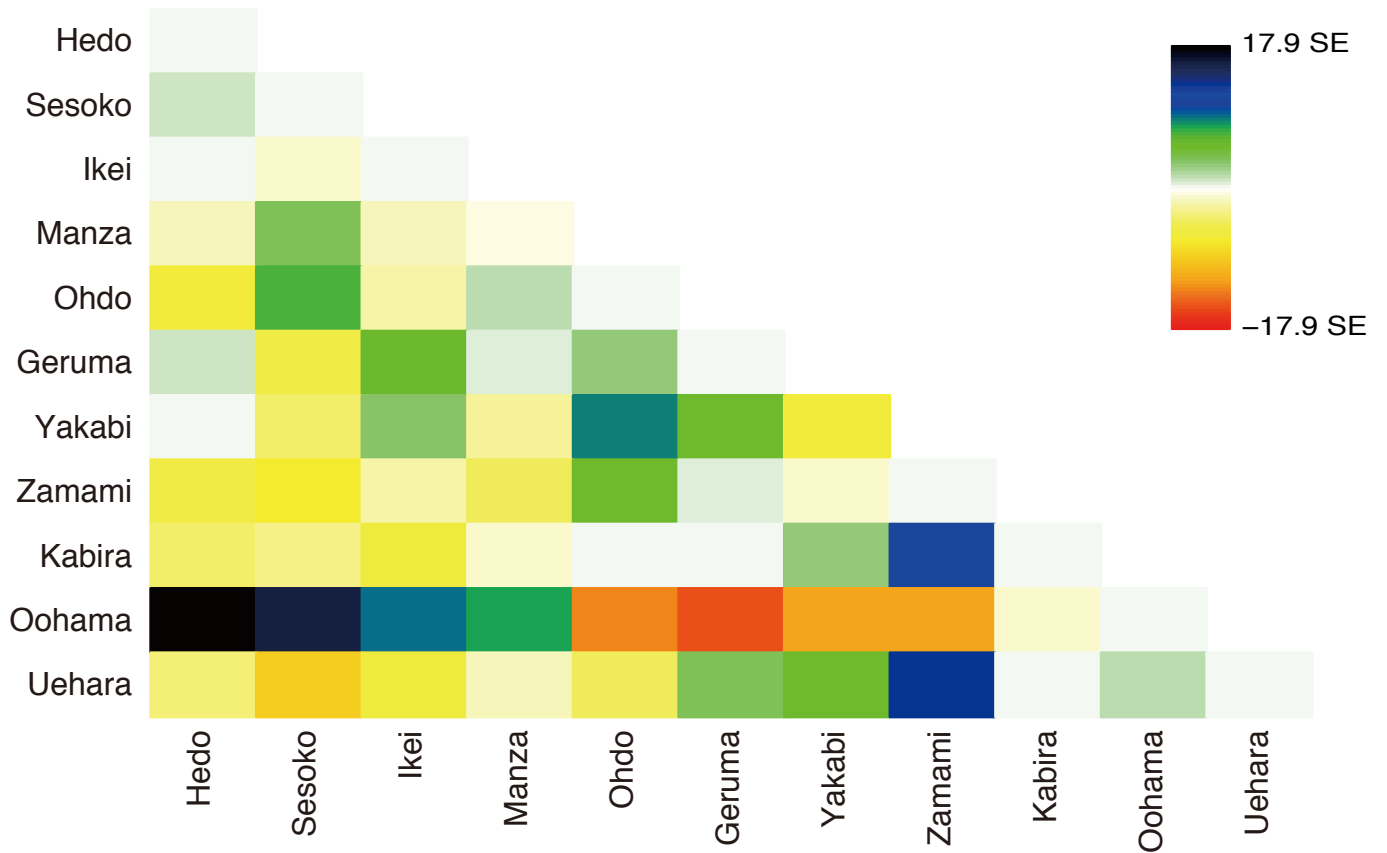

**Supplementary Fig. 5**



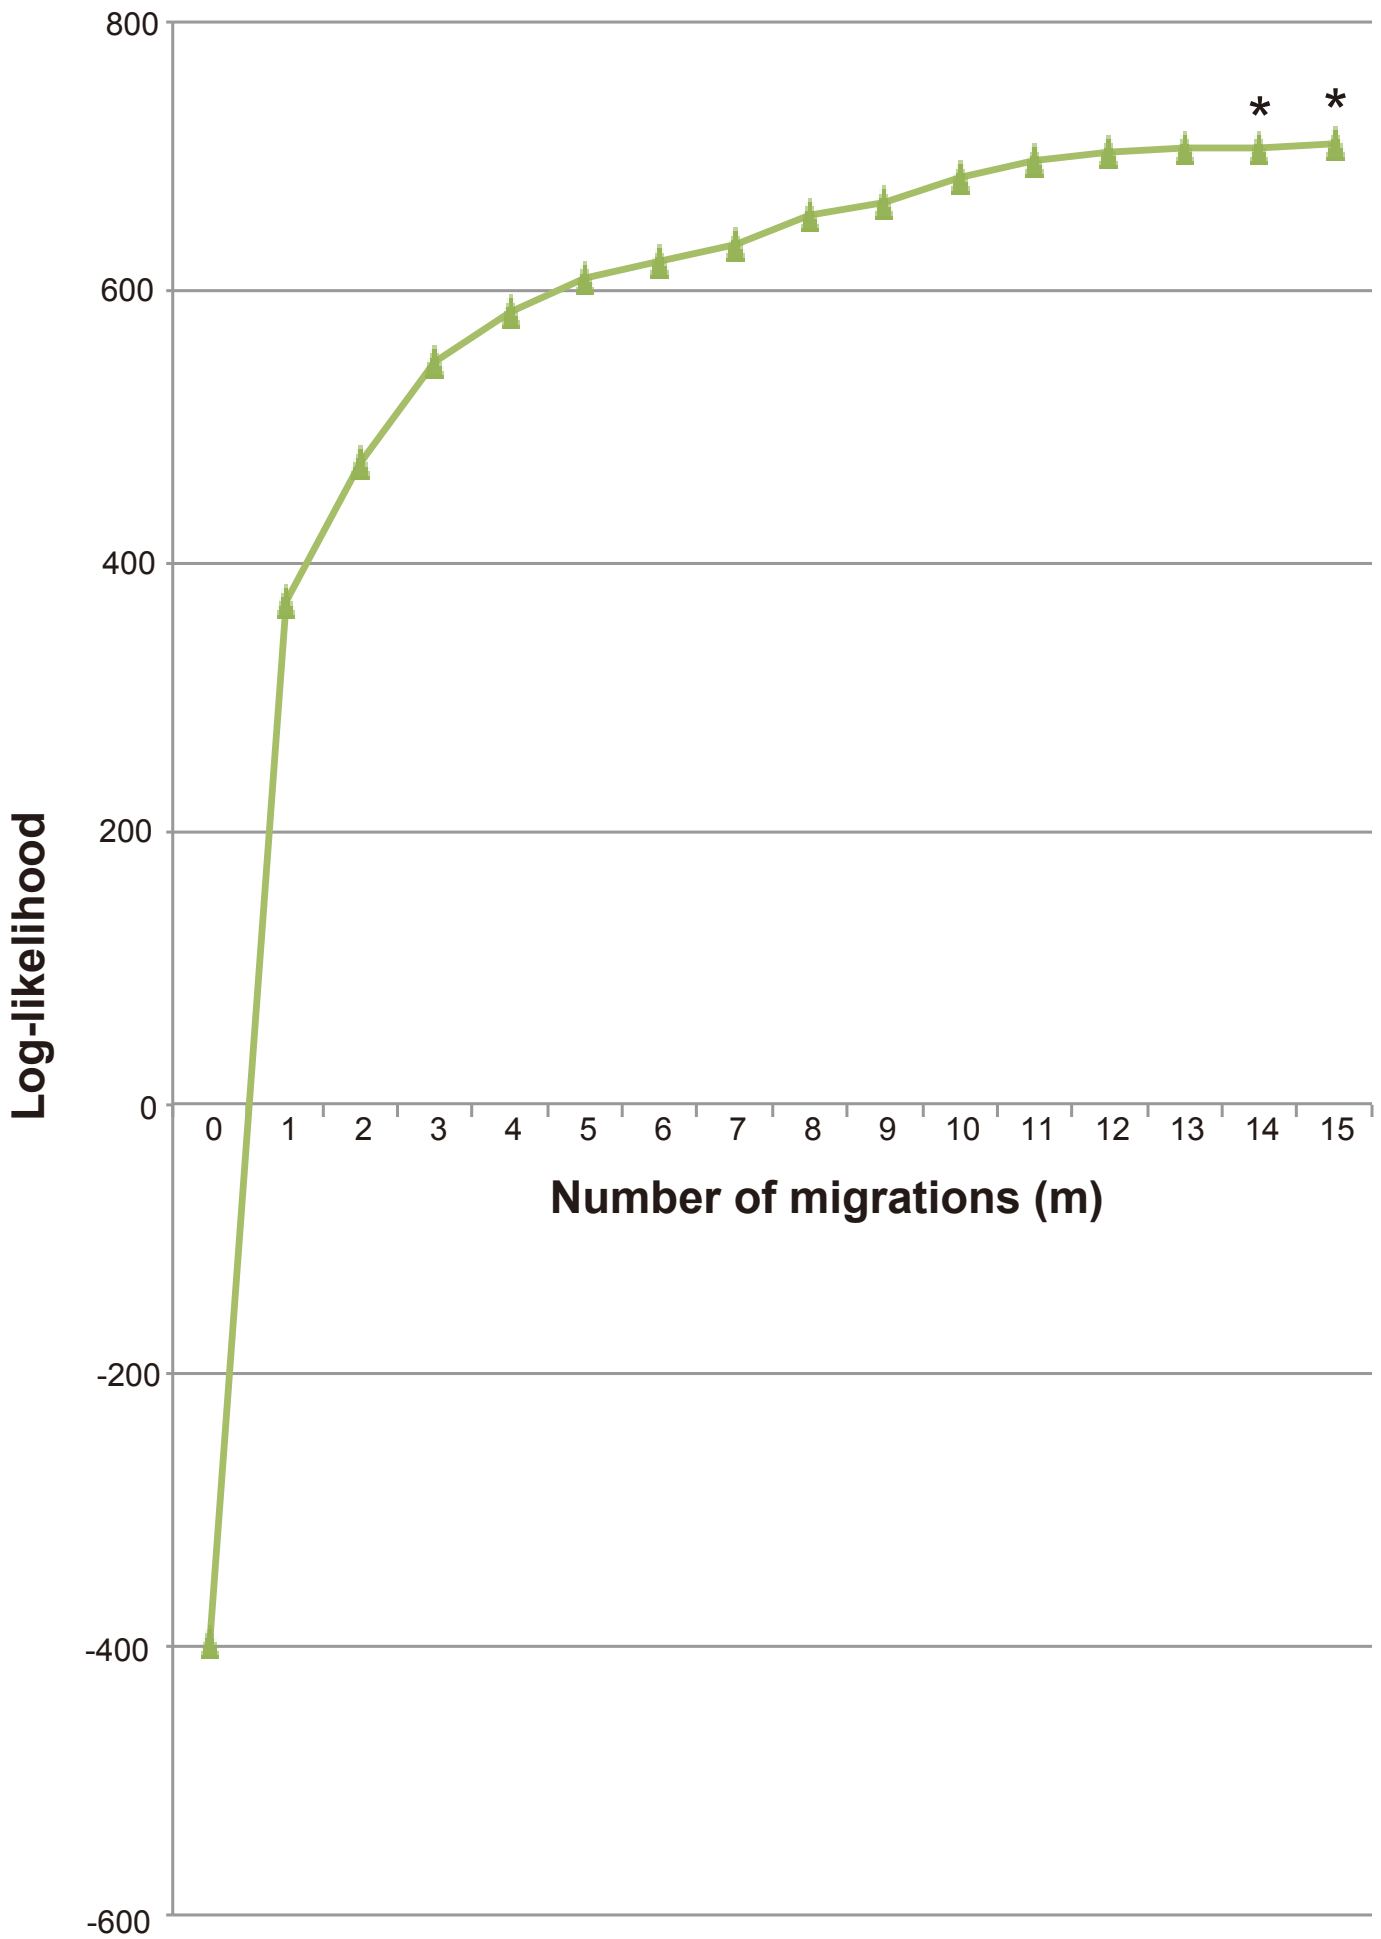

**Supplementary Fig. 6**

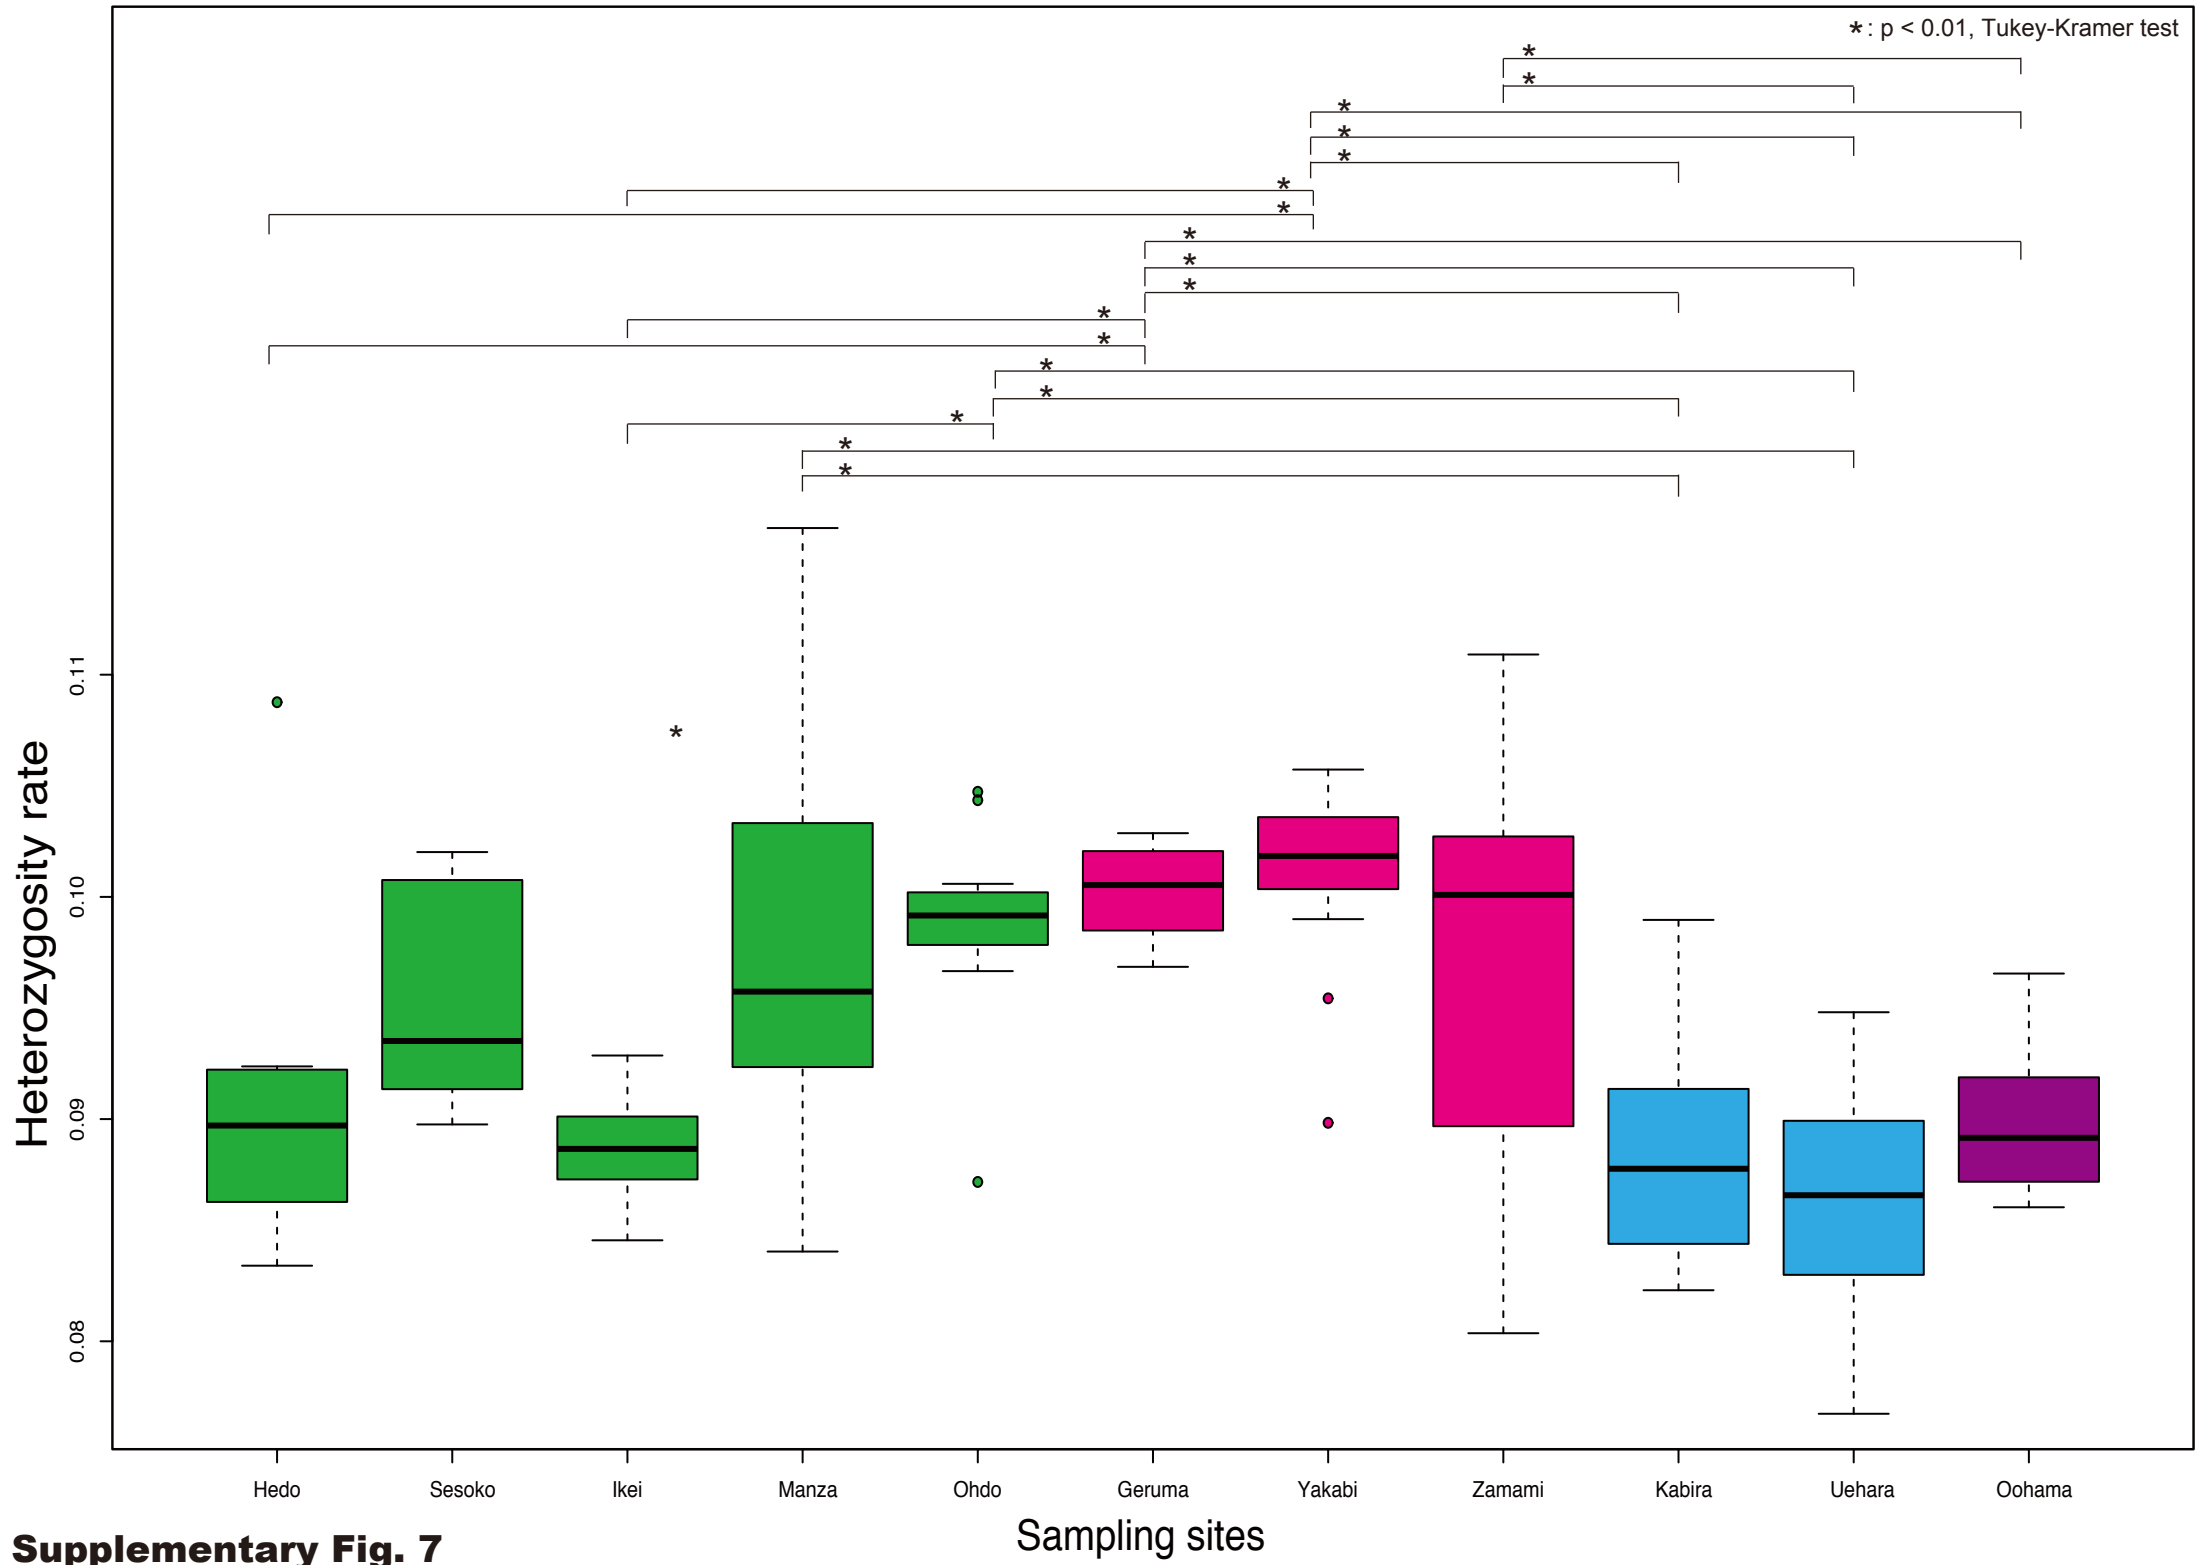

**Supplementary Fig. 7**

Supplementary Table 1. Summary of *Acropora digitifera* genome assembly version 1.1.

|                                       | Ver. 1 (Shinzato et al., 2011)* | Ver. 1.1 (This study) |
|---------------------------------------|---------------------------------|-----------------------|
| Total assembly basepair               | 419 Mbp                         | 447 Mbp               |
| Number of Scaffolds                   | 4,765                           | 2,420                 |
| Maximum scaffold length (bp)          | 1,590,019                       | 2,549,845             |
| N50 length (bp)                       | 191,489                         | 483,559               |
| Number of scaffolds longer than 1 Mbp | 6                               | 59                    |
| GC %                                  | 33.98                           | 33.09                 |
| Gap %                                 | 12.96                           | 15.24                 |

\* Shinzato et al. (2011). Using the *Acropora digitifera* genome to understand coral responses to environmental change. *Nature* 476, 320-323.

Supplementary Table 2. Mapping coverage of each individual.

| Sample name | Coverage | SD      |
|-------------|----------|---------|
| Hd1         | 6.3606   | 89.3299 |
| Hd2         | 5.6974   | 28.8122 |
| Hd3         | 4.4638   | 23.8887 |
| Hd4         | 5.2785   | 31.211  |
| Hd5         | 6.0081   | 22.733  |
| Hd6         | 4.4947   | 34.272  |
| Hd7         | 5.4441   | 33.7491 |
| Hd8         | 6.8873   | 53.0772 |
| Hd9         | 5.0283   | 31.8202 |
| Ik1         | 5.9052   | 24.1078 |
| Ik2         | 5.3453   | 20.4816 |
| Ik3         | 4.9175   | 12.0784 |
| Ik4         | 5.4435   | 14.9242 |
| Ik5         | 5.0572   | 18.8035 |
| Ik6         | 5.5356   | 21.8584 |
| Ik7         | 4.4913   | 12.3866 |
| Ik8         | 5.1384   | 22.0075 |
| Ik9         | 4.6097   | 22.6955 |
| Irm10       | 4.4736   | 26.3762 |
| Irm17       | 4.4157   | 24.1778 |
| Irm2        | 6.3191   | 39.5431 |
| Irm21       | 6.2886   | 21.3364 |
| Irm22       | 5.1876   | 22.0857 |
| Irm23       | 4.7185   | 17.5663 |
| Irm24       | 5.36     | 31.15   |
| Irm25       | 5.305    | 23.9669 |
| Irm26       | 5.8949   | 21.6899 |
| Irm27       | 6.0486   | 24.6419 |
| Irm3        | 5.685    | 44.4    |
| Irm4        | 4.8595   | 28.4608 |
| Irm5        | 4.823    | 33.0183 |
| Irm7        | 4.898    | 35.4157 |
| Irm9        | 5.3694   | 25.5019 |
| IS1         | 5.378    | 34.6059 |
| IS10        | 7.2266   | 29.677  |
| IS2         | 5.4952   | 26.2356 |
| IS3         | 4.8314   | 22.2159 |
| IS4         | 5.5703   | 24.5537 |
| IS5         | 5.7003   | 34.1984 |
| IS6         | 5.0165   | 29.8529 |
| IS7         | 6.205    | 35.6842 |
| IS8         | 4.597    | 24.0946 |
| IS9         | 5.7699   | 32.1219 |
| Isy12       | 8.26     | 60.55   |
| Isy15       | 6.36     | 48      |
| Isy16       | 7        | 51.145  |
| Isy17       | 6        | 40      |
| Isy18       | 7.8      | 49.48   |
| Isy21       | 4.554    | 14.94   |
| Isy22       | 4.58     | 10.3    |
| Isy23       | 5.38     | 17.6    |
| Isy24       | 5.65     | 22.4    |

|       |         |          |
|-------|---------|----------|
| Isy25 | 4.2     | 16.12    |
| Isy26 | 5.95    | 19.8     |
| Isy27 | 4.66    | 16.5     |
| Isy4  | 6.36    | 26.6     |
| Isy7  | 7.9     | 40.61    |
| Isy8  | 7.957   | 26.733   |
| KrA1  | 7.7891  | 16.8909  |
| KrA10 | 9.3605  | 25.7282  |
| KrA11 | 6.9799  | 16.9296  |
| KrA12 | 9.9389  | 28.7032  |
| KrA13 | 9.3215  | 29.2653  |
| KrA14 | 8.7348  | 25.1737  |
| KrA15 | 7.4747  | 14.0994  |
| KrA2  | 7.2758  | 15.5348  |
| KrA3  | 8.7793  | 18.0328  |
| KrA4  | 10.8014 | 42.956   |
| KrA5  | 7.8821  | 27.2656  |
| KrA6  | 10.3948 | 51.1178  |
| KrA7  | 7.7349  | 21.0603  |
| KrA8  | 7.0726  | 16.2489  |
| KrA9  | 8.5935  | 24.9698  |
| KrC1  | 8.9343  | 30.5972  |
| KrC10 | 9.3455  | 55.0326  |
| KrC11 | 11.8119 | 69.6765  |
| KrC12 | 9.9486  | 41.8156  |
| KrC13 | 11.9591 | 61.6358  |
| KrC14 | 10.1248 | 58.5169  |
| KrC15 | 9.8893  | 65.5252  |
| KrC2  | 7.0252  | 33.8842  |
| KrC3  | 9.2138  | 47.4095  |
| KrC4  | 5.4491  | 11.8477  |
| KrC5  | 8.8802  | 24.771   |
| KrC6  | 8.0571  | 30.6705  |
| KrC7  | 9.6861  | 38.1604  |
| KrC8  | 11.4566 | 33.3997  |
| KrC9  | 9.281   | 28.987   |
| KrD1  | 3.765   | 32.162   |
| KrD11 | 3.9     | 11.61    |
| KrD13 | 4.22    | 35.716   |
| KrD3  | 2.876   | 21.565   |
| KrD8  | 2.9243  | 22.628   |
| KrD9  | 3.176   | 25.642   |
| KrE1  | 10.1789 | 35.8984  |
| KrE10 | 5.0788  | 27.7967  |
| KrE11 | 7.171   | 25.6827  |
| KrE12 | 7.5259  | 25.8185  |
| KrE13 | 5.9007  | 33.146   |
| KrE14 | 5.7978  | 21.0957  |
| KrE15 | 8.4677  | 19.5119  |
| KrE2  | 10.6866 | 50.7823  |
| KrE3  | 8.2071  | 27.619   |
| KrE4  | 9.7364  | 36.2596  |
| KrE5  | 9.1076  | 28.4391  |
| KrE6  | 20.0578 | 103.0541 |
| KrE7  | 3.6371  | 5.8318   |

|      |         |          |
|------|---------|----------|
| KrE8 | 14.9095 | 79.6395  |
| KrE9 | 4.9126  | 19.6334  |
| mz1  | 10.6959 | 75.5944  |
| mz10 | 5.4695  | 35.4351  |
| mz11 | 5.0278  | 18.7131  |
| mz12 | 5.9639  | 15.2008  |
| mz2  | 9.8257  | 208.1963 |
| mz3  | 6.4756  | 80.0516  |
| mz4  | 10.691  | 66.9277  |
| mz5  | 6.9743  | 39.5089  |
| mz6  | 6.9991  | 44.3849  |
| mz7  | 7.4523  | 32.4522  |
| mz8  | 5.6297  | 30.8291  |
| mz9  | 6.1119  | 28.5675  |
| mzC1 | 8.35    | 29.78    |
| mzC2 | 7.46    | 30.19    |
| MzC3 | 4.44    | 22.18    |
| MzC4 | 6.458   | 25.5     |
| od1  | 10.6988 | 41.6719  |
| od10 | 9.49    | 38.42    |
| od11 | 9.37    | 30.46    |
| od12 | 9.63    | 34.23    |
| od13 | 9.42    | 39.9     |
| od14 | 8.74    | 48.85    |
| od15 | 8.76    | 27.57    |
| od18 | 8.86    | 35.52    |
| od19 | 9.04    | 32.02    |
| od2  | 4.5628  | 46.7632  |
| od22 | 8.75    | 29.05    |
| od23 | 9.06    | 35.45    |
| od24 | 8.28    | 43.34    |
| od25 | 9.15    | 39.02    |
| od26 | 8.95    | 41.78    |
| od27 | 8.48    | 29.29    |
| od3  | 11.1614 | 43.0636  |
| od4  | 5.5975  | 47.0097  |
| od5  | 6.2188  | 55.1213  |
| od6  | 5.6517  | 37.8428  |
| od7  | 9.3188  | 86.4964  |
| od8  | 5.5412  | 96.2062  |
| od9  | 4.8686  | 86.4572  |
| ss1  | 9.8407  | 51.2597  |
| ss2  | 10.3453 | 63.9256  |
| ss3  | 7.2498  | 45.1932  |
| ss4  | 6.4991  | 63.7103  |
| ss5  | 5.9955  | 36.0256  |
| ss6  | 6.4787  | 40.45    |
| ss7  | 6.4503  | 25.1972  |
| ss8  | 5.9552  | 42.6045  |

Abbreviations: Hd: Hedo, Ik: Ikei, Irm: Uehara, IS: Oohama, Isy: Kabira, KrA: Geruma, KrC: Yakabi, KrD: Aka, KrE: Zamami, mz: Manza, od: Ohdo, ss: Sesoko.

Supplementary Table 3. Three-population test for *A. digitifera* of Okinawa

| Target | Source1 | Source2 | f3        | std.err  | Z score  |
|--------|---------|---------|-----------|----------|----------|
| Yakabi | Ohdo    | Geruma  | -8.54E-05 | 8.59E-06 | -9.94898 |
| Yakabi | Kabira  | Geruma  | -6.97E-05 | 9.10E-06 | -7.66525 |
| Yakabi | Oohama  | Geruma  | -7.31E-05 | 9.70E-06 | -7.53858 |
| Manza  | Ohdo    | Oohama  | -9.16E-05 | 1.25E-05 | -7.3152  |
| Yakabi | Uehara  | Geruma  | -6.23E-05 | 9.41E-06 | -6.62242 |
| Yakabi | Zamami  | Geruma  | -4.80E-05 | 8.34E-06 | -5.74926 |
| Yakabi | Geruma  | Sesoko  | -6.23E-05 | 1.11E-05 | -5.62397 |
| Yakabi | Hedo    | Geruma  | -5.11E-05 | 1.03E-05 | -4.95832 |
| Yakabi | Geruma  | Manza   | -4.12E-05 | 9.63E-06 | -4.27461 |
| Yakabi | Ikei    | Geruma  | -4.38E-05 | 1.03E-05 | -4.25703 |
| Yakabi | Zamami  | Ikei    | -4.03E-05 | 1.02E-05 | -3.9697  |
| Manza  | Uehara  | Sesoko  | -5.56E-05 | 1.44E-05 | -3.85651 |
| Yakabi | Zamami  | Hedo    | -3.95E-05 | 1.06E-05 | -3.71388 |
| Yakabi | Zamami  | Ohdo    | -3.11E-05 | 8.65E-06 | -3.59165 |
| Manza  | Geruma  | Sesoko  | -4.92E-05 | 1.39E-05 | -3.54186 |
| Manza  | Ohdo    | Hedo    | -3.38E-05 | 1.22E-05 | -2.76861 |
| Manza  | Zamami  | Sesoko  | -3.15E-05 | 1.35E-05 | -2.34103 |
| Yakabi | Zamami  | Manza   | -2.18E-05 | 9.48E-06 | -2.29607 |
| Yakabi | Zamami  | Sesoko  | -2.52E-05 | 1.12E-05 | -2.24909 |
| Manza  | Kabira  | Sesoko  | -2.93E-05 | 1.39E-05 | -2.10726 |
| Manza  | Yakabi  | Sesoko  | -2.81E-05 | 1.34E-05 | -2.08992 |
| Manza  | Oohama  | Geruma  | -2.58E-05 | 1.27E-05 | -2.04074 |
| Zamami | Kabira  | Geruma  | -1.84E-05 | 9.16E-06 | -2.01258 |
| Yakabi | Ohdo    | Uehara  | -1.91E-05 | 9.52E-06 | -2.00447 |

p-value < 0.05 (Z score < -1.96) are shown

Supplementary Table 4. Migration weight and p-values inferred by *TreeMix* with 13 migration events allowed.

|        |                           | Weight of the edge | p-values      |
|--------|---------------------------|--------------------|---------------|
| Source | Sink                      |                    |               |
| Sesoko | Ohdo                      | 0.382422           | <2.22507e-308 |
| Oohama | Hedo Ikei Manza<br>Sesoko | 0.50146            | <2.22507e-308 |
| Ohdo   | Manza                     | 0.126096           | 7.40816e-05   |
| Ohdo   | Yakabi                    | 0.0749277          | 0.00814736    |
| Ikei   | Geruma Yakabi             | 0.202702           | 1.48395e-07   |

Bootstrap support more than 50% (see Supplementary Table 5) are shown.



Supplementary Table 5. Bootstrap percentages (100 replicates) for each migration edges (m= 3 to 14).

| Number of migration events allowed in <i>TreeMix</i> |                              | 3  | 4  | 5  | 6  | 7  | 8  | 9  | 10 | 11 | 12 | 13 | 14 |
|------------------------------------------------------|------------------------------|----|----|----|----|----|----|----|----|----|----|----|----|
| Source                                               | Sink                         |    |    |    |    |    |    |    |    |    |    |    |    |
| Seso                                                 | Ohdo                         | 86 | 81 | 86 | 90 | 85 | 91 | 88 | 88 | 84 | 89 | 81 | 84 |
| Ooha                                                 | Hedo<br>Ikei<br>Manz<br>Seso | 99 | 97 | 98 | 92 | 94 | 85 | 90 | 87 | 83 | 78 | 79 | 76 |
| Ohdo                                                 | Manz                         | 32 | 60 | 67 | 73 | 63 | 76 | 67 | 71 | 69 | 73 | 68 | 76 |
| Ohdo                                                 | Yaka                         | -  | -  | -  | -  | 28 | 41 | 61 | 63 | 77 | 85 | 86 | 86 |
| Ikei                                                 | Geru<br>Yaka                 | 43 | 51 | 62 | 55 | 69 | 64 | 66 | 61 | 60 | 60 | 64 | 56 |
| Ohdo                                                 | Yone                         | -  | -  | 24 | 29 | 45 | 38 | 38 | 45 | 41 | 37 | 36 | 46 |
| Seso                                                 | Manz                         | -  | -  | -  | -  | 31 | 30 | 45 | 39 | 39 | 49 | 46 | 52 |
| Hedo<br>Ikei<br>Manz<br>Seso                         | Ikei                         | -  | -  | -  | 22 | 28 | 28 | 32 | 32 | 34 | 29 | 29 | 33 |
| Yone                                                 | Ohdo                         | -  | -  | -  | -  | -  | 25 | 30 | 34 | 29 | 34 | 31 | 26 |
| Ooha<br>Ueha<br>Yone                                 | Yaka                         | -  | -  | -  | -  | -  | -  | -  | -  | 21 | -  | 23 | 18 |
| Seso                                                 | Yone                         | -  | -  | -  | -  | -  | -  | -  | -  | -  | 30 | 41 | 48 |
| Ooha                                                 | Hedo                         | -  | -  | -  | -  | -  | -  | 27 | -  | -  | -  | 26 | 23 |
| Yone                                                 | Manza                        | -  | -  | -  | -  | -  | -  | -  | -  | 26 | -  | 29 | -  |
| Ueha                                                 | Manz                         | -  | -  | -  | -  | -  | -  | -  | -  | -  | 22 | 29 | 47 |
| Yone                                                 | Zama                         | -  | -  | -  | -  | -  | -  | -  | -  | -  | -  | 30 | 32 |
| Ueha                                                 | Ooha                         | -  | -  | -  | -  | -  | -  | -  | -  | -  | -  | 26 | 20 |

“-“ represents bootstrap support is lower than 20 or no migration edge detected.
